# Supplementary material
Source: Springer Nature journal article supplement (https://www.springermedizin.de/resource/supplementary/12888_2010_784_MOESM4_ESM.pdf/9478738)

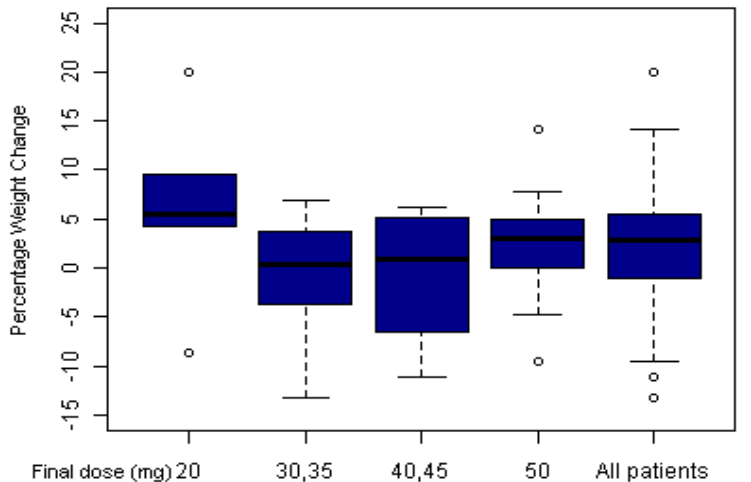

|                   | n | 5       | 10      | 4       | 23         | 42         |
|-------------------|---|---------|---------|---------|------------|------------|
| Weight gain > 7%  |   | 2 (40%) | 0 (0%)  | 0 (0%)  | 3 (13.04%) | 5 (11.90%) |
| Weight loss < -7% |   | 1 (20%) | 1 (10%) | 1 (25%) | 1 (4.35%)  | 4 (9.52%)  |

Supplement: MOESM4 [file 9478738]
